# Supplementary material for: Flexible and rigid “chirally distorted” π-systems: binaphthyl conjugates as organic CPL-active chromophores
Source: Royal Society of Chemistry journal article supplement (doi:10.1039/d5ob00086f), 2025-01-01
Supplement: d5ob00086f1.pdf [file d5ob00086f1.pdf]

*Supporting information for:*

# **Flexible and Rigid “Chirally Distorted” $\pi$ -Systems: Binaphthyl Conjugates as Organic CPL-Active Chromophores**

Giovanni Preda,<sup>a</sup> Elisa Maria Ciccarello,<sup>a</sup> Alessio Bianchi,<sup>a</sup> Francesco Zinna,<sup>b</sup> Chiara Botta,<sup>c</sup> Lorenzo Di Bari<sup>b</sup> and Dario Pasini\*<sup>a</sup>

<sup>a</sup>*Department of Chemistry and INSTM, University of Pavia Via Taramelli 12, 27100 Italy;* <sup>b</sup>*Dipartimento di Chimica e Chimica Industriale, Università di Pisa, Via Giuseppe Moruzzi 13, 56124 Pisa, Italy;* <sup>c</sup>*SCITEC-CNR, Consiglio Nazionale delle Ricerche, Istituto di Scienze e Tecnologie Chimiche ‘G. Natta’, Via A. Corti 12, 20133 Milano, Italy;*

## ***Table of Contents***

|                                                           |    |
|-----------------------------------------------------------|----|
| <i>1. Additional Figures</i>                              | S1 |
| <i>2. Copies of NMR and mass spectra of new compounds</i> | S9 |

## 4. Additional Figures

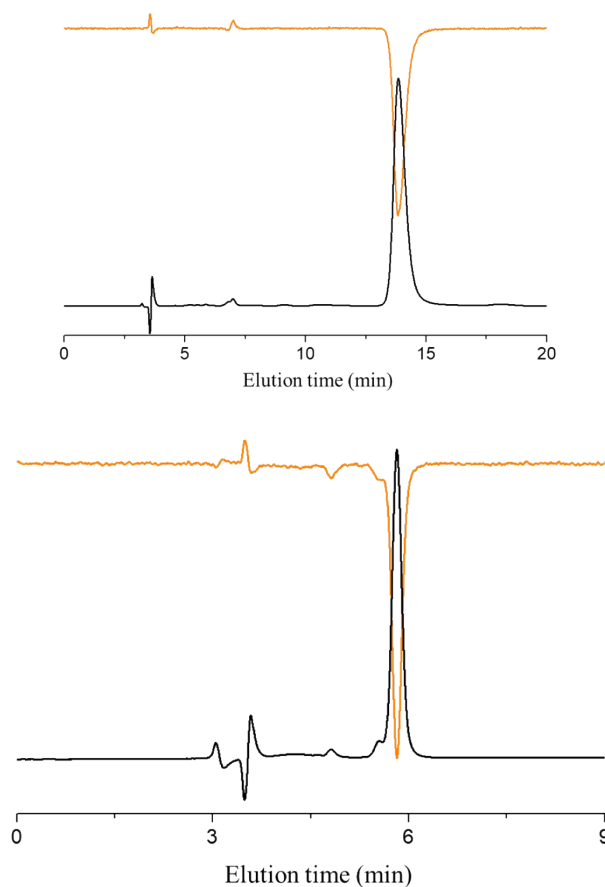

**Figure S1. Top:** Chiral HPLC analysis of compound (*S*)-**1**. Stationary phase: cellulose tris (3,5-dimethylphenylcarbamate) in Hex:EtOH:DEA 50:50:0.1 at 280 nm (black trace: UV-vis trace; orange trace: CD trace). **Bottom:** Chiral HPLC analysis of compound (*SS*)-**2**. Stationary phase: cellulose tris (3,5-dimethylphenylcarbamate) in Hex:EtOH:DEA 50:50:0.1 at 280 nm (black trace: UV-vis trace; orange trace: CD trace).

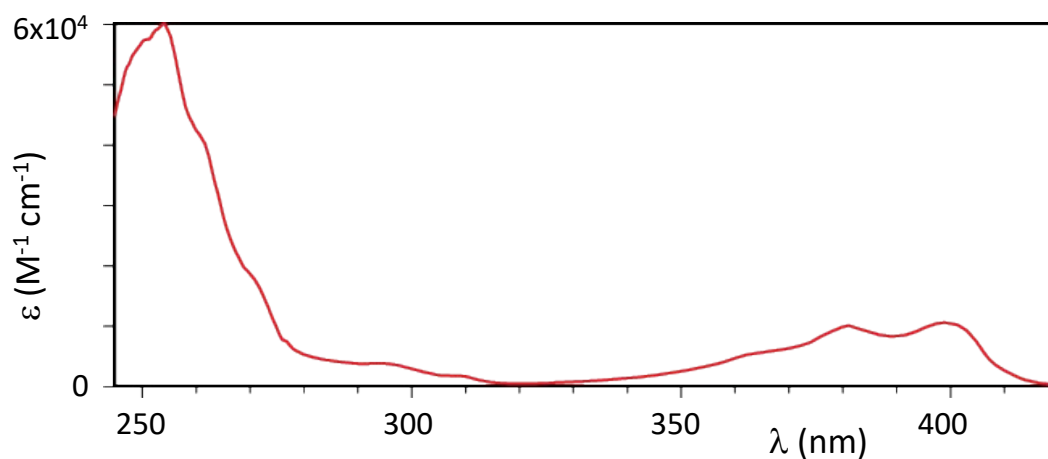

**Figure S2.** UV-vis absorption spectrum of acridone in  $CHCl_3/MeOH$  1:1.

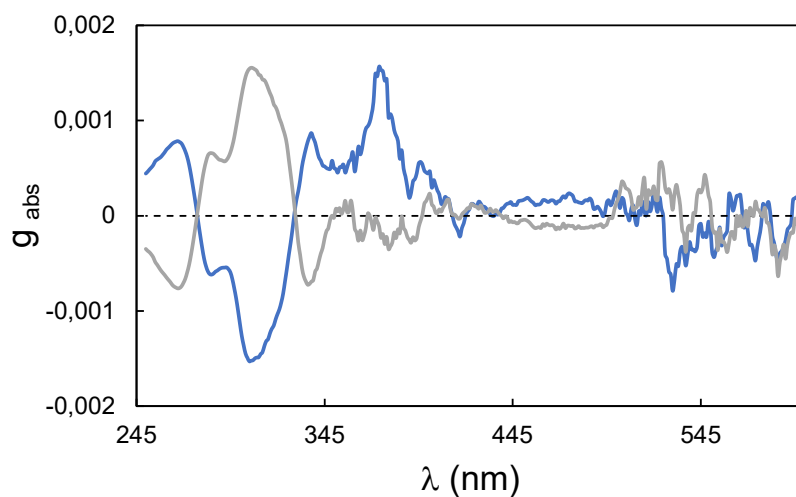

**Figure S3.** Plot of  $g_{\text{abs}}$  vs wavelength for compounds (*R*)-1 (blue trace) and (*S*)-1 (grey trace) in  $\text{CHCl}_3/\text{MeOH}$  1:1.

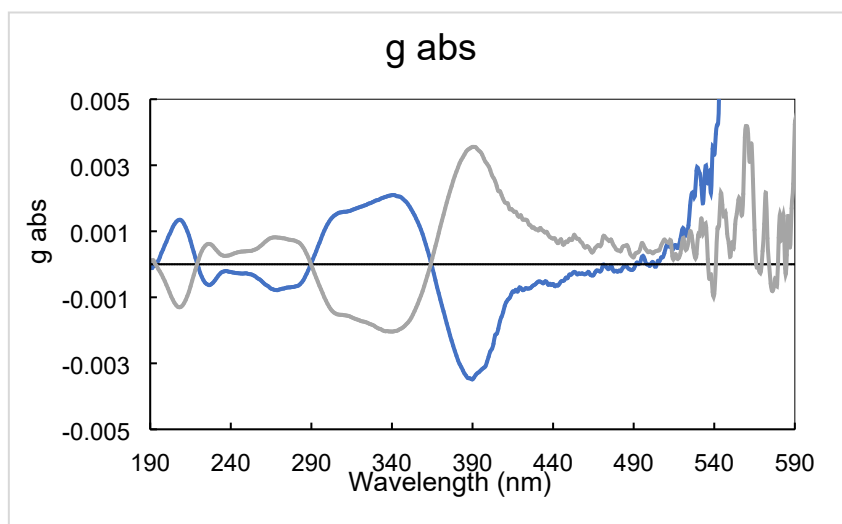

**Figure S4.** Plot of  $g_{\text{abs}}$  vs wavelength for compounds (*RR*)-2 (blue trace) and (*SS*)-2 (grey trace) in  $\text{CHCl}_3$ .

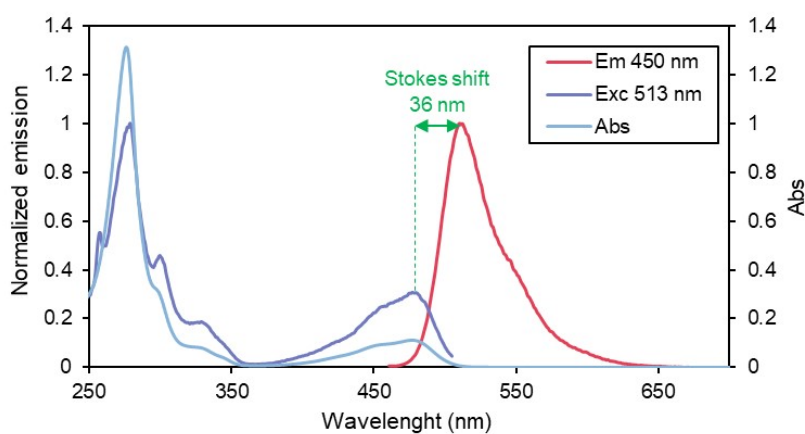

**Figure S5.** Comparison of absorption and emission spectra for compound 1 in solution.

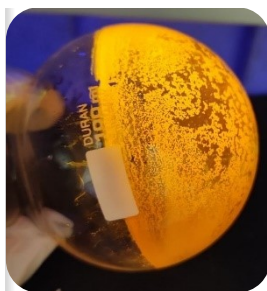

**Figure S6.** Emissive behaviour of compound **2** under illumination of a UV lamp for TLC.

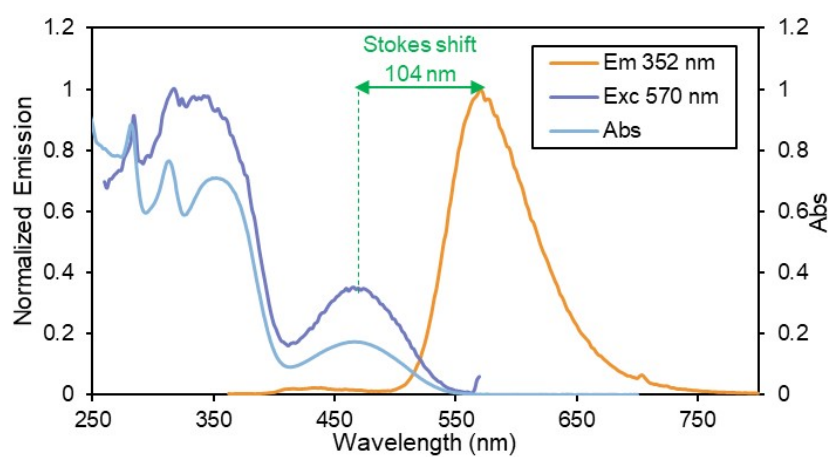

**Figure S7.** Comparison of absorption and emission spectra for compound **2** in solution.

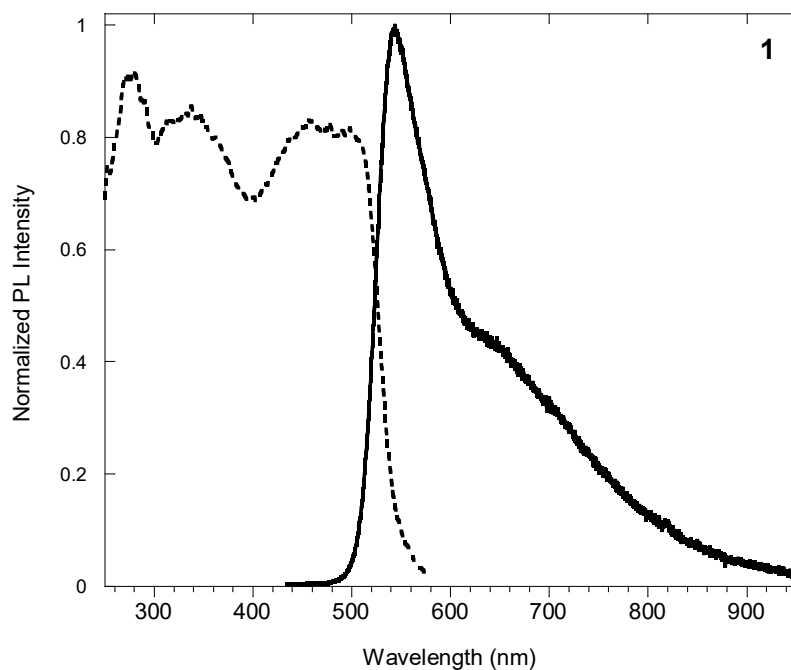

**Figure S8.** Emission properties of a spin-coated film of compound **1**. PL spectrum (solid line, excitation at 408nm) and PL excitation spectrum (dashed line, emission at 620nm).

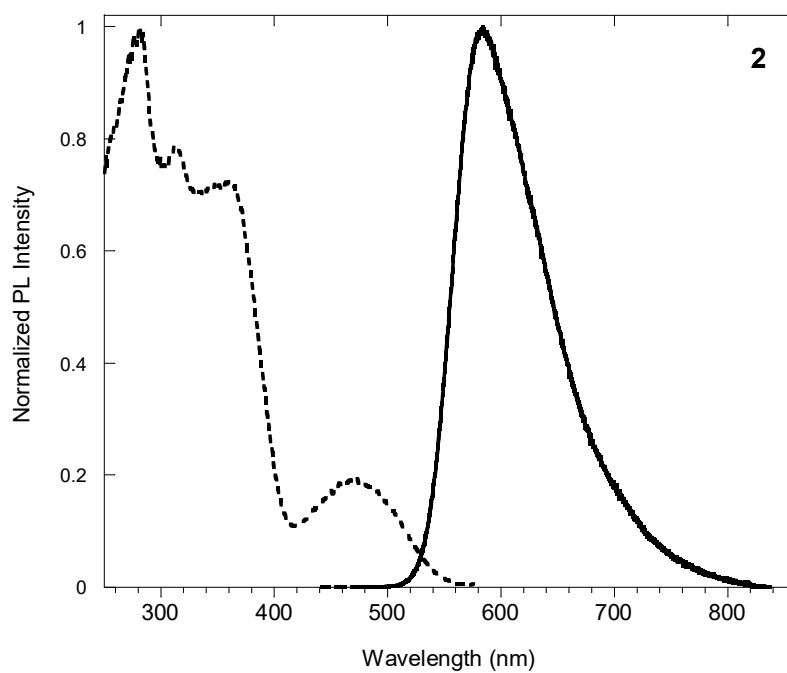

**Figure S9.** Emission properties of a spin-coated film of compound **2**. PL spectrum (solid line, excitation at 408nm) and PL excitation spectrum (dashed line, emission at 485nm).

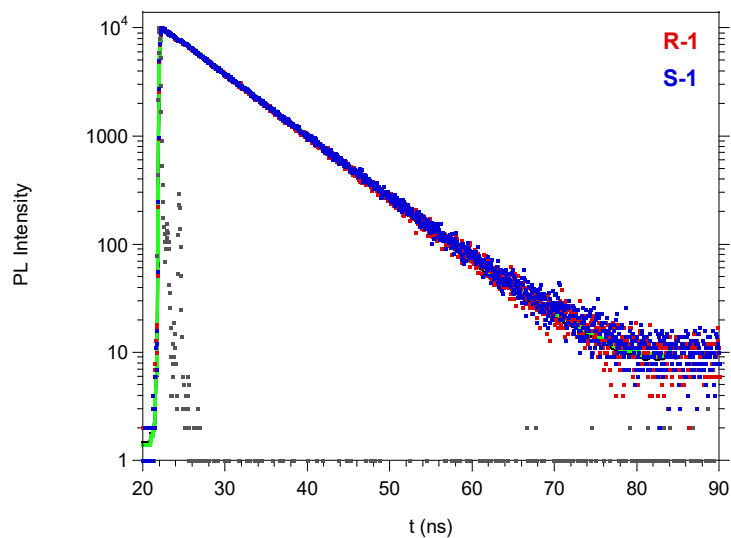

**Figure S10.** PL decays of solutions of **1** (excitation at 408nm, emission at 511nm). Prompt (grey points), monoexponential fits (solid lines) with  $\tau=7.46$  ns,  $\chi^2=1.368767$  (R-1, black) and  $\tau=7.54$  ns,  $\chi^2=1.506768$  (S-1, green).

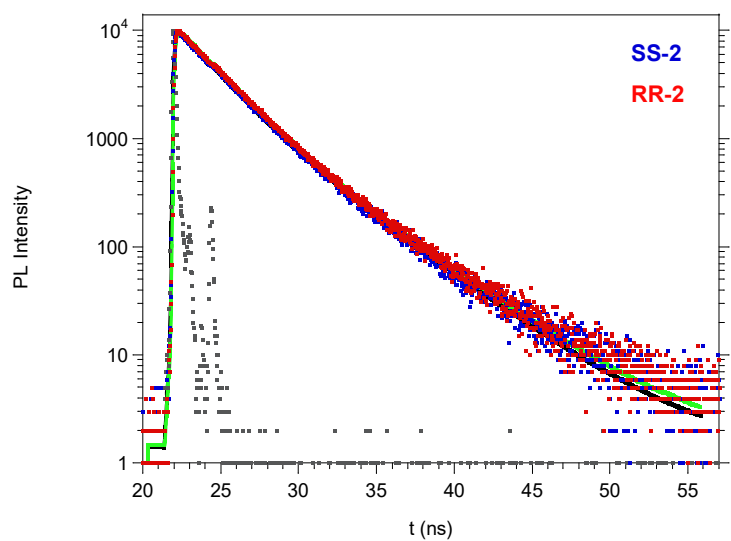

**Figure S11.** PL decays of solutions of **2**. (excitation at 408nm, emission at 575nm). Prompt (grey points); biexponential fits (solid lines) with parameters  $t_1=2.17$ ns,  $t_2=4.30$  ns,  $A_1=0.70$ ,  $A_2=0.30$ ,  $\chi^2=1.654366$  (black, SS-2);  $t_1=2.28$ ns,  $t_2=4.53$  ns,  $A_1=0.75$ ,  $A_2=0.25$ ,  $\chi^2=1.343742$  (green, RR-2).

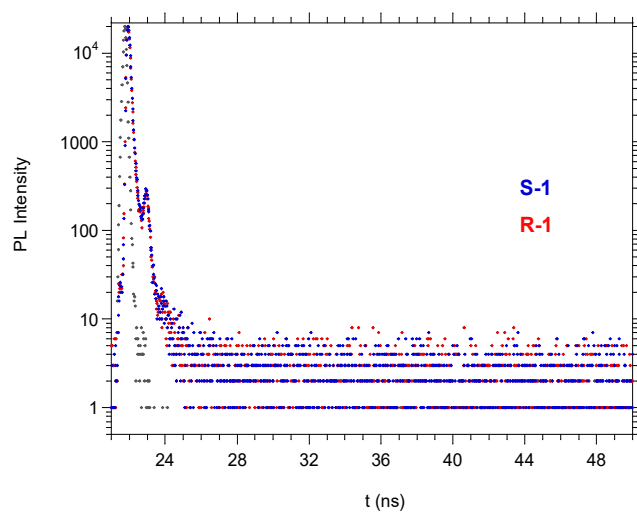

**Figure S12.** PL decays of films of **1**. (excitation at 408nm, emission at 544nm). Prompt (grey points)

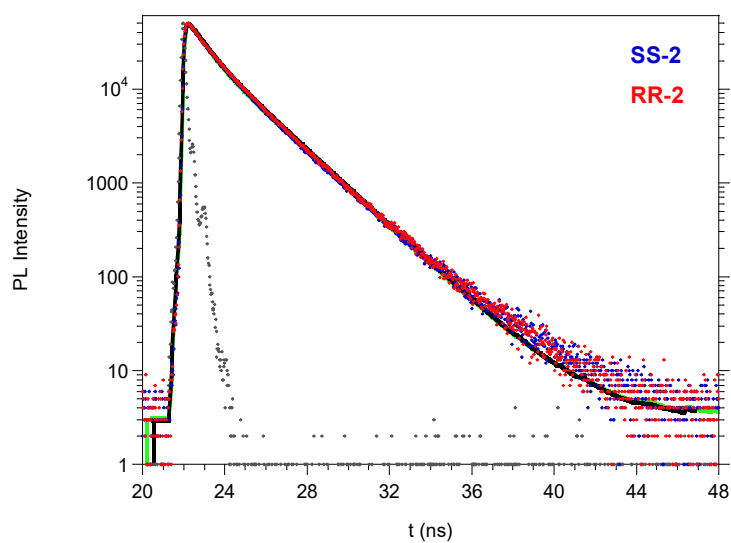

**Figure S13.** PL decays of film of **2**. (excitation at 408nm, emission at 585nm). Prompt (grey points). Biexponential fits (solid lines) with parameters  $t_1=0.67\text{ns}$ ,  $t_2=2.16\text{ ns}$ ,  $A_1=0.50$ ,  $A_2=0.50$ ,  $\chi^2=3.972821$  (green, SS-2);  $t_1=0.67\text{ns}$ ,  $t_2=2.15\text{ ns}$ ,  $A_1=0.47$ ,  $A_2=0.53$ ,  $\chi^2=3.772541$  (black, RR-2)

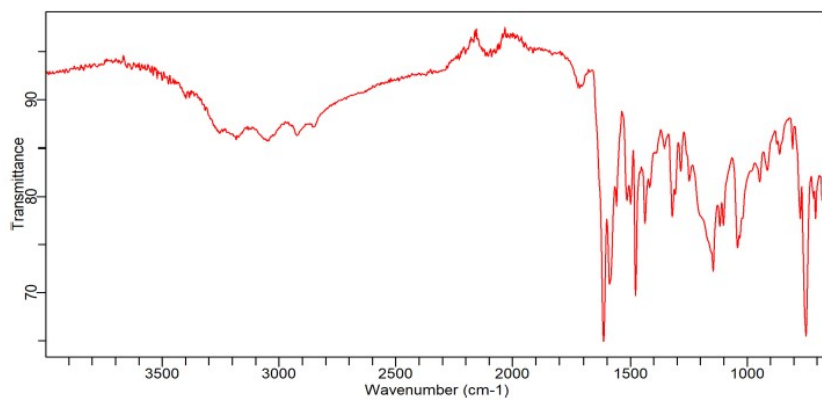

**Figure S14.** FT IR spectra of **1**



## 5. Copies of NMR and mass spectra of new compounds

### Compound (R)-4

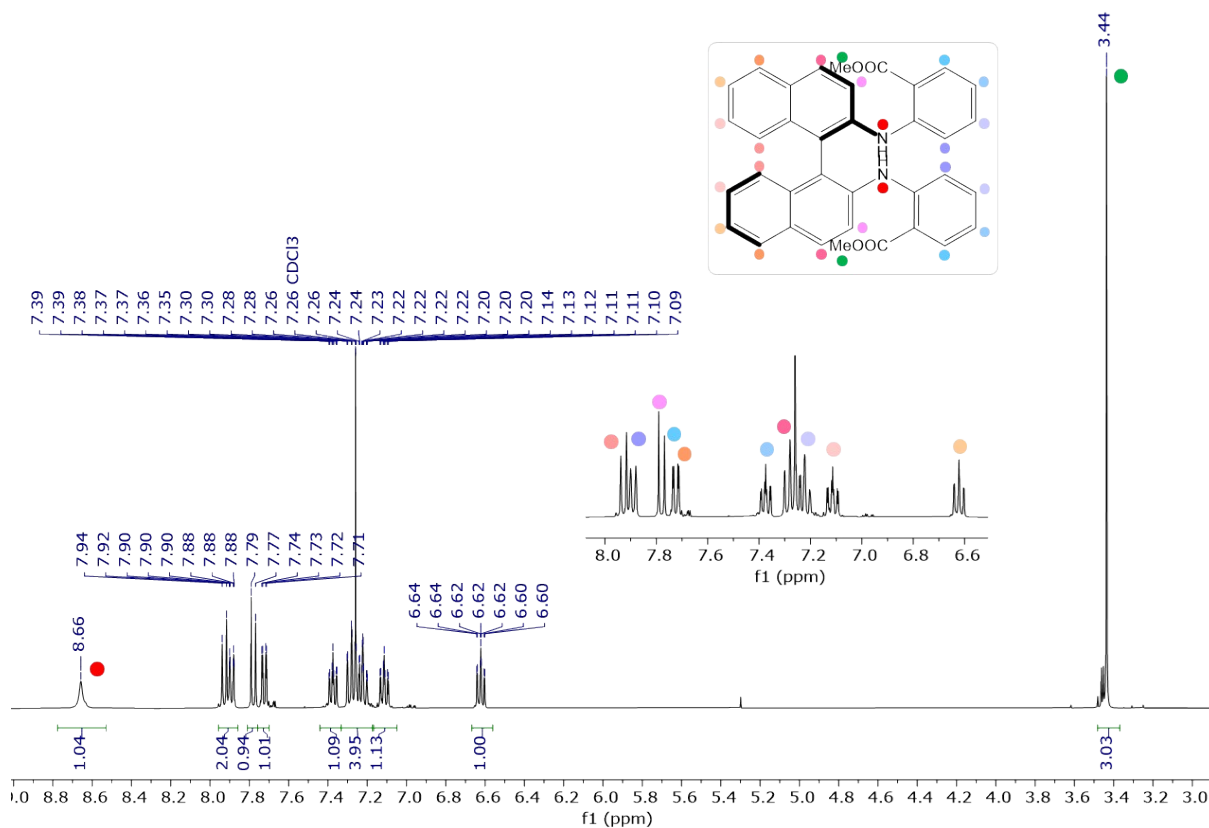

Fig.

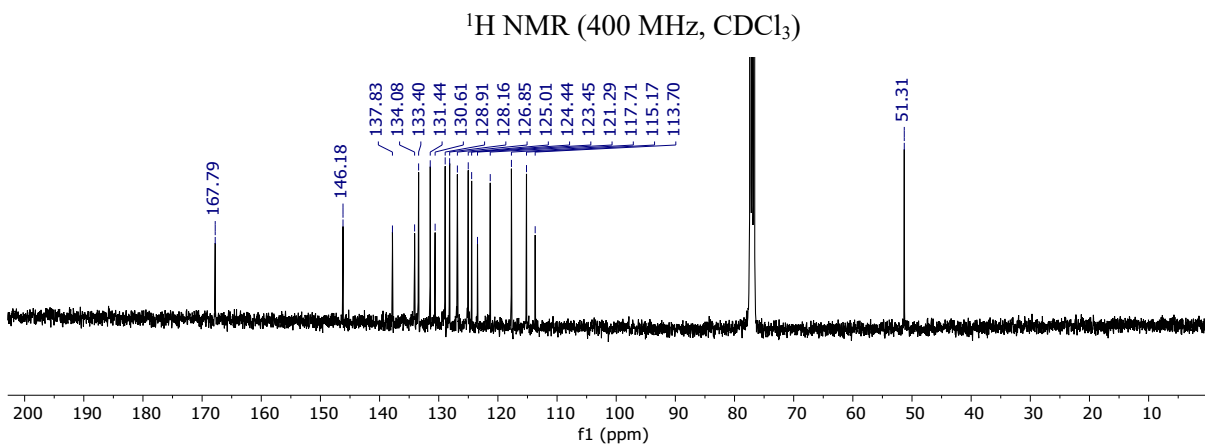

Fig.

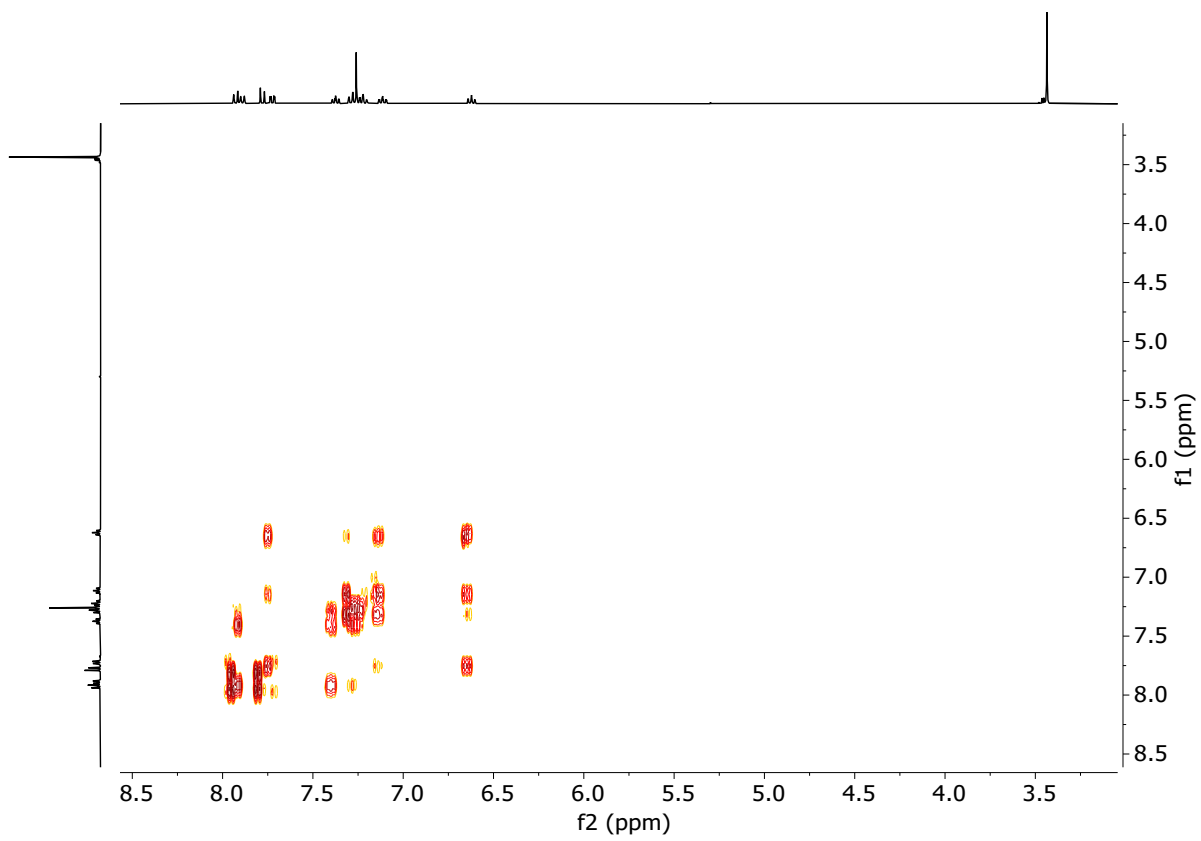

H,H COSY

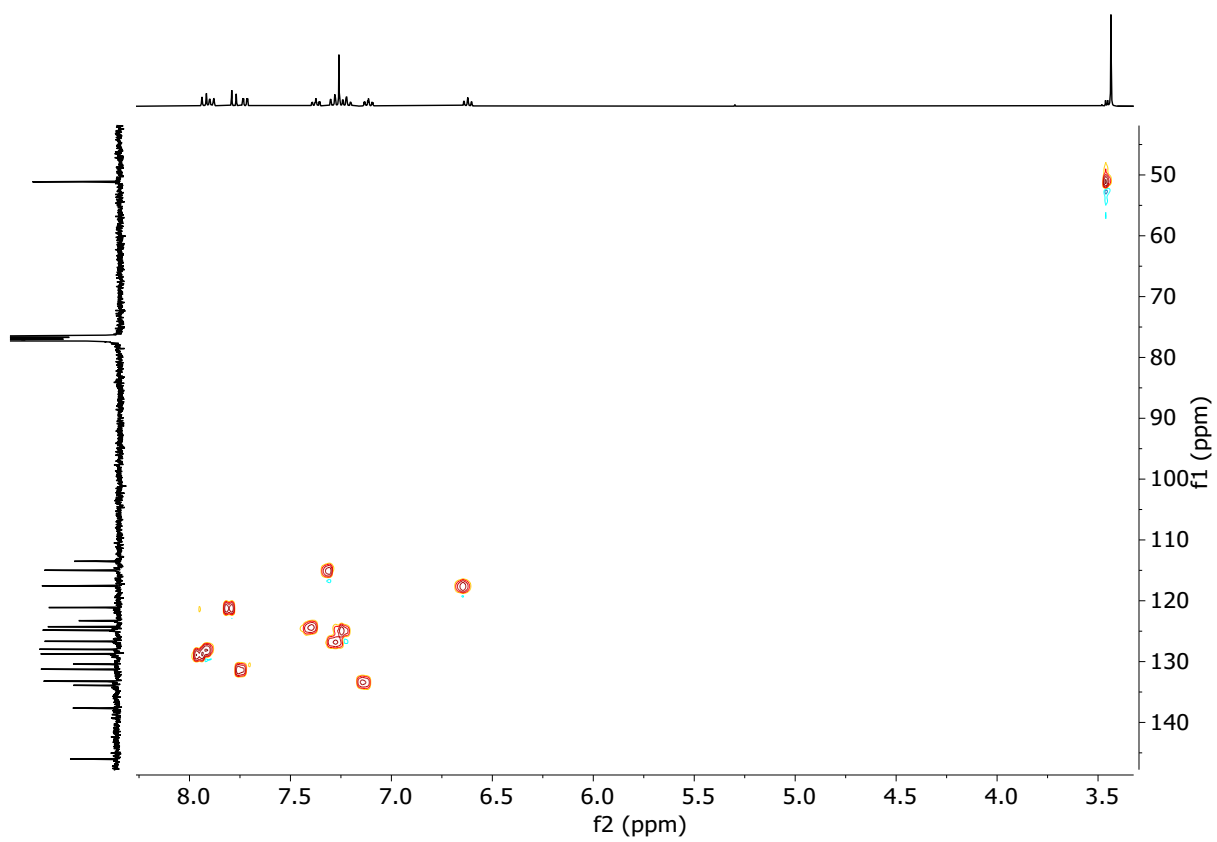

HSQC

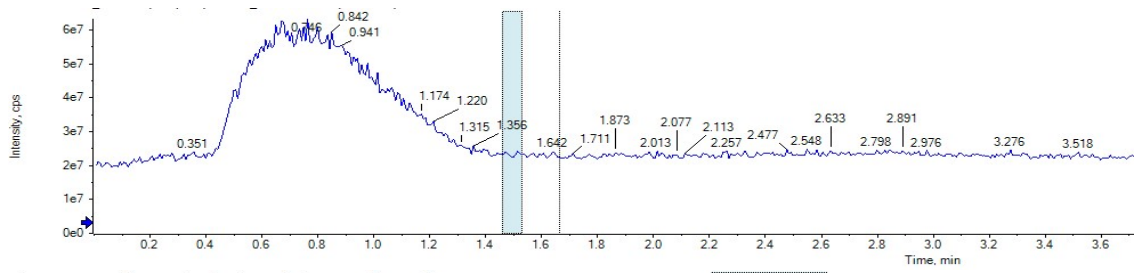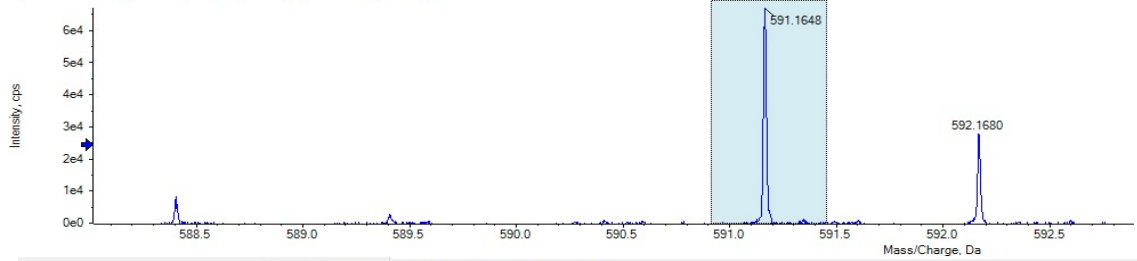

Found elemental compositions

| Hit | Formula                                                       | m/z      | RDB  | ppm  | MS Rank | MSMS Rank | MSMS Rank | Found |
|-----|---------------------------------------------------------------|----------|------|------|---------|-----------|-----------|-------|
| 1   | C <sub>36</sub> H <sub>28</sub> N <sub>2</sub> O <sub>4</sub> | 591.1681 | 24.0 | -5.5 | 1       |           |           | NA/20 |

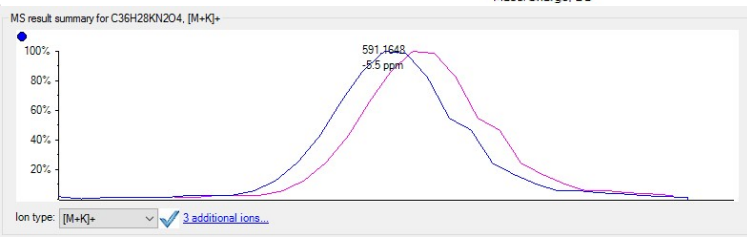

HRMS.

# Compound (R)-6

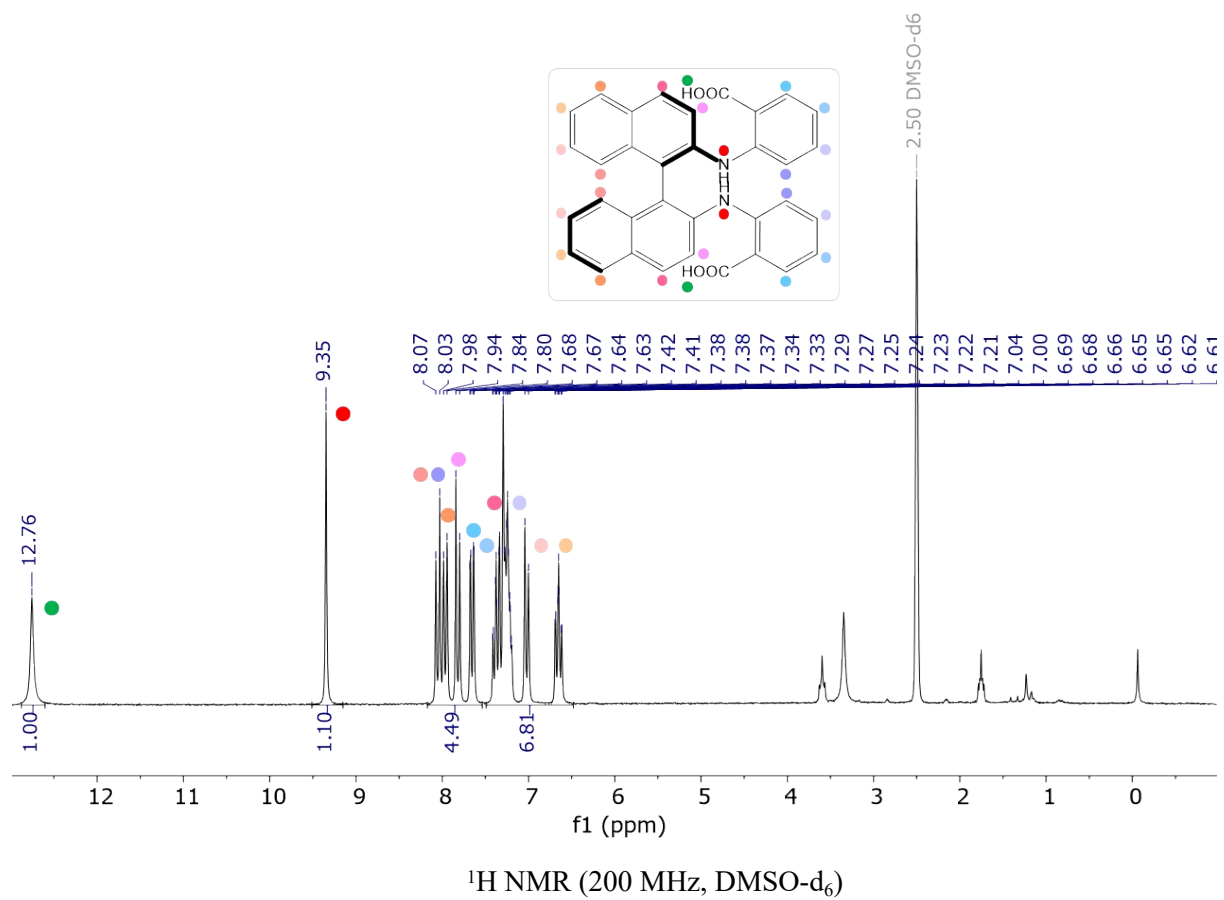

# Compound (R)-1

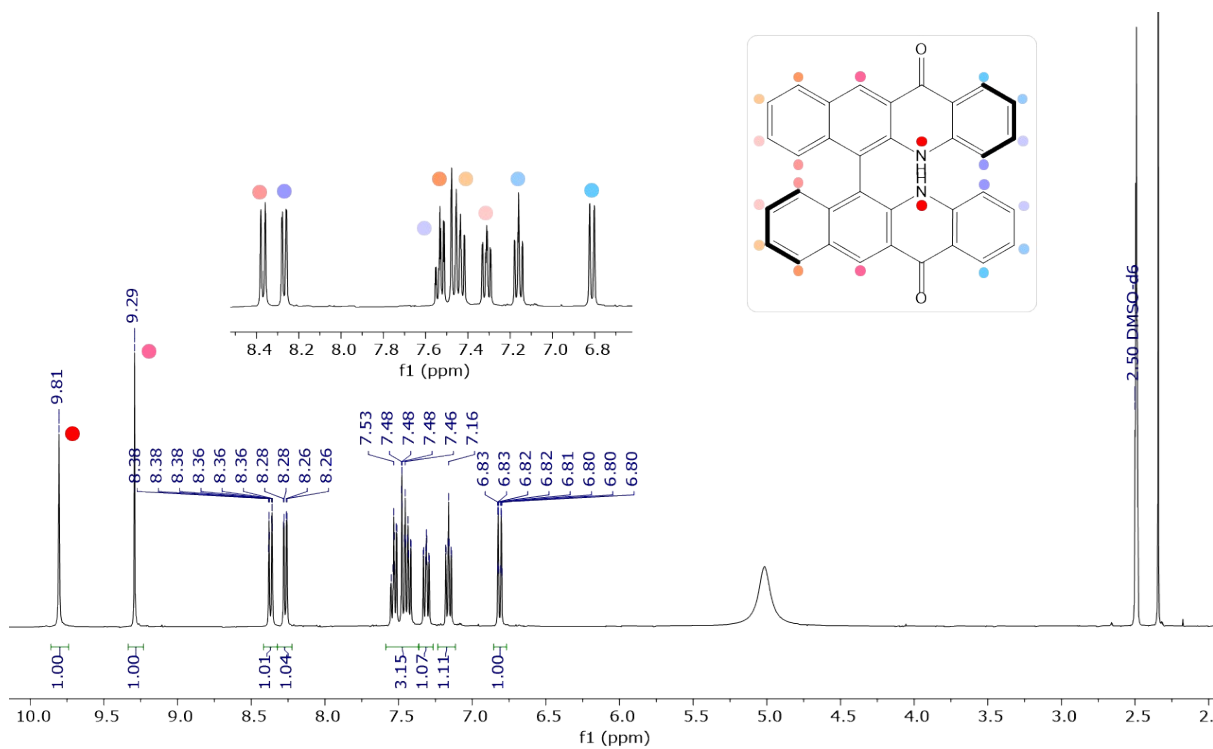

<sup>1</sup>H NMR (400 MHz, DMSO-d<sub>6</sub>)

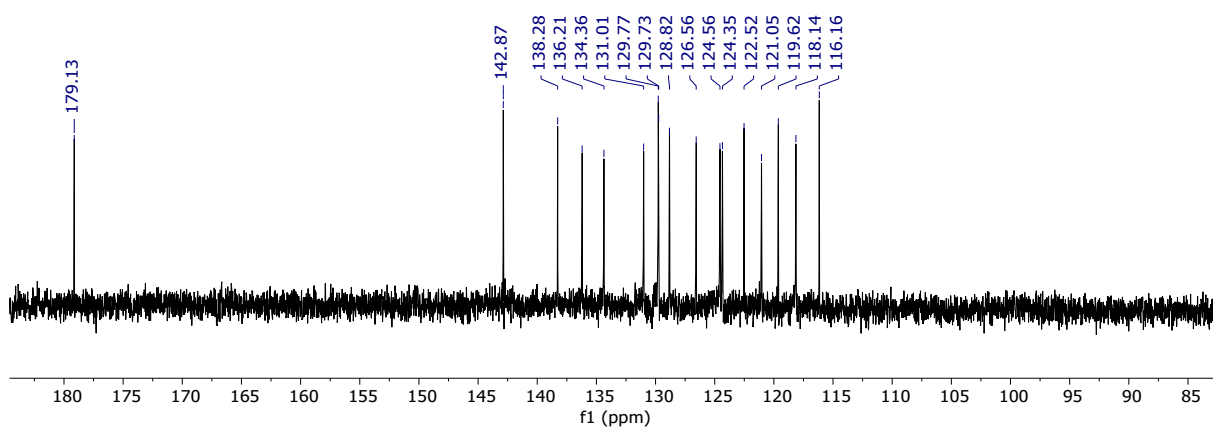

<sup>13</sup>C NMR (101 MHz, DMSO-d<sub>6</sub>)

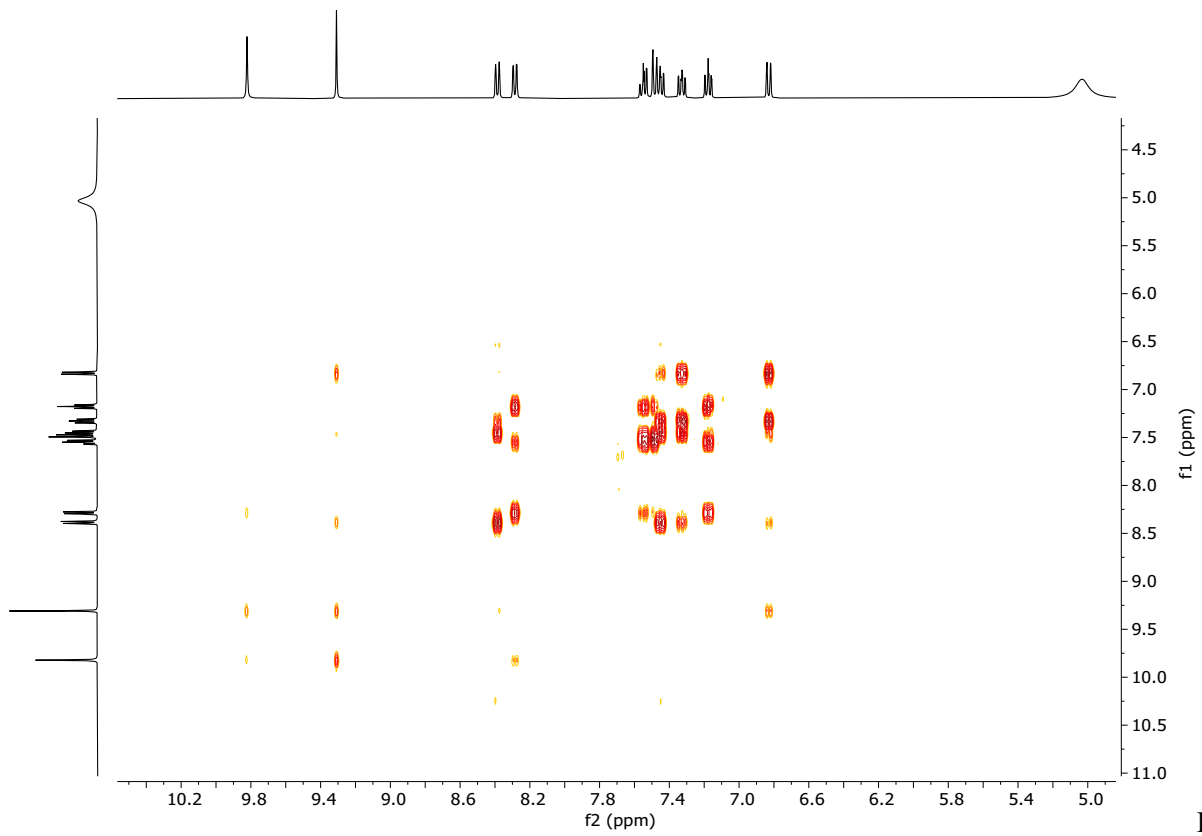

Fig.

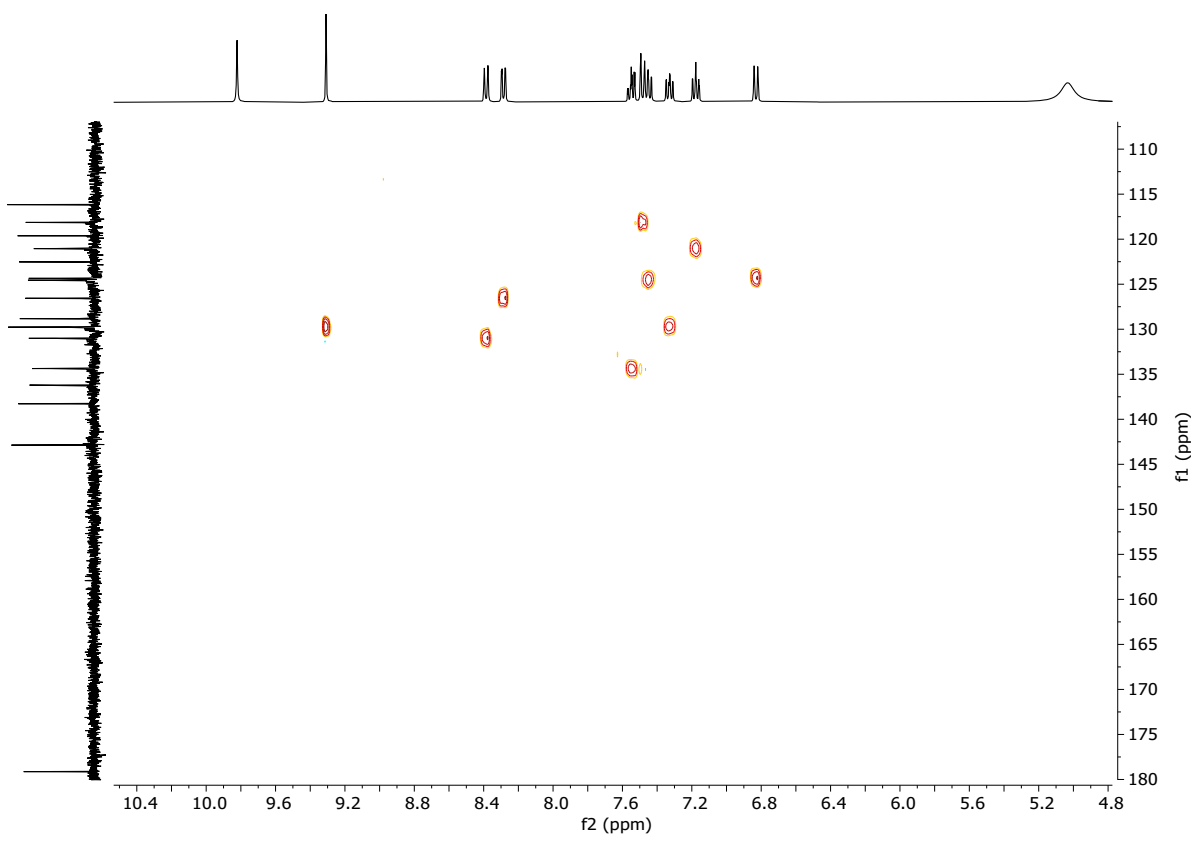

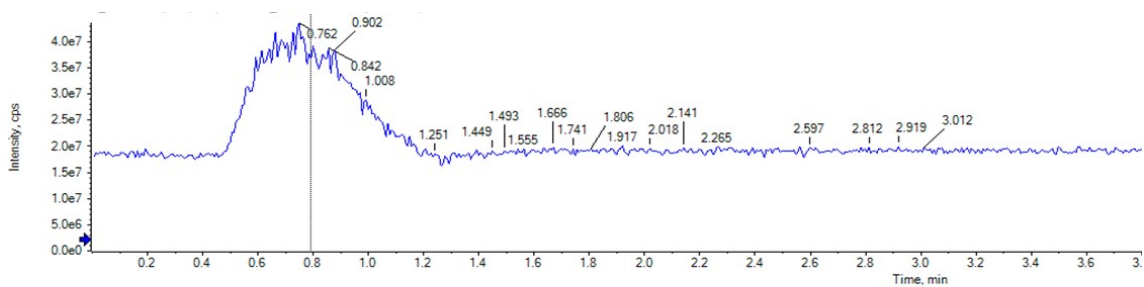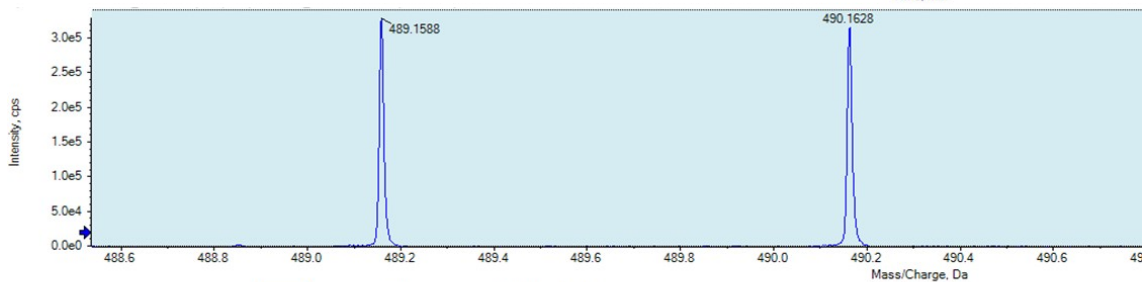

Found elemental compositions

| Hit | Formula                                                       | m/z      | RDB  | ppm  | MS Rank | MSMS Rank | MSMS Rank | Found |
|-----|---------------------------------------------------------------|----------|------|------|---------|-----------|-----------|-------|
| 1   | C <sub>34</sub> H <sub>20</sub> N <sub>2</sub> O <sub>2</sub> | 489.1598 | 26.0 | -2.0 | 1       |           |           | NA/1  |

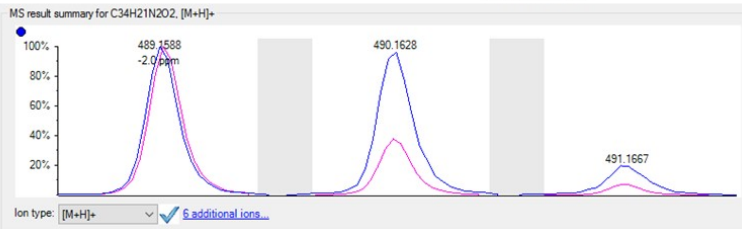

HRMS

# Compound (R)-5

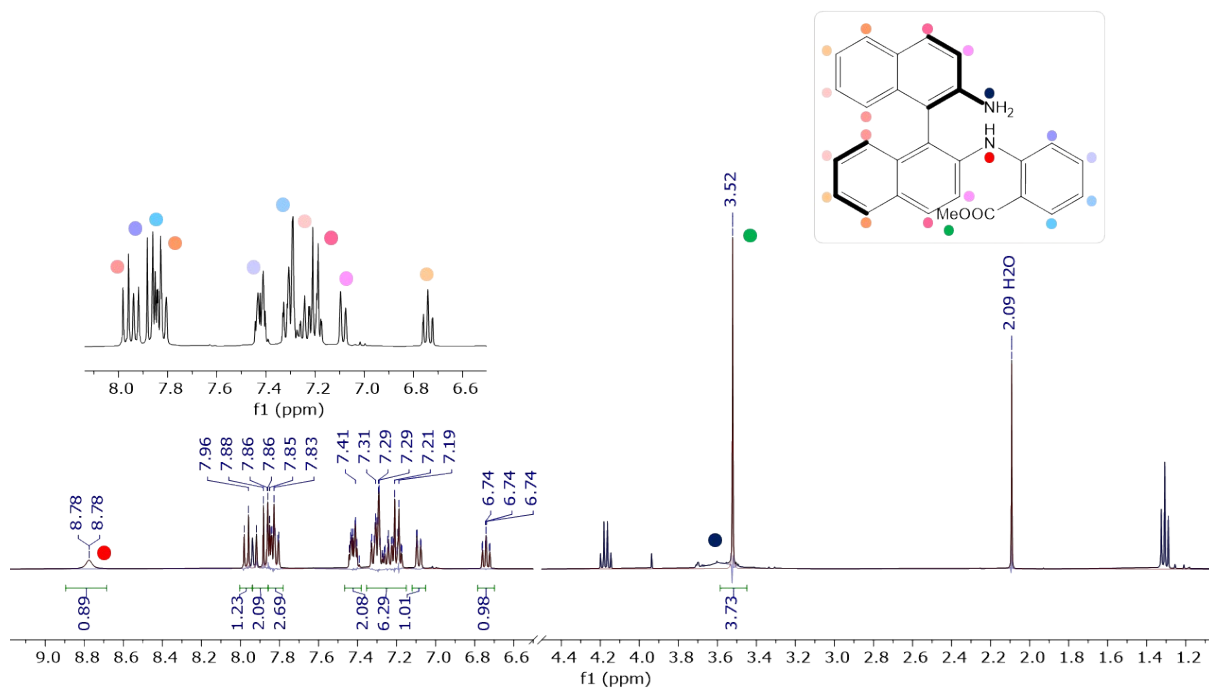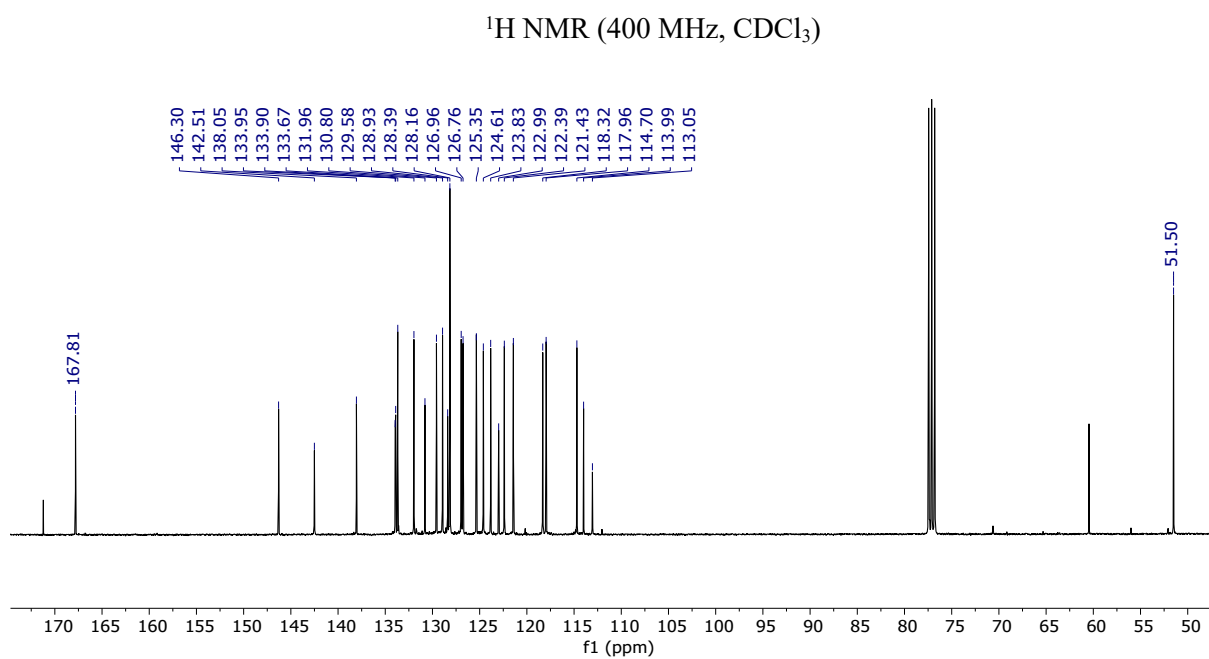



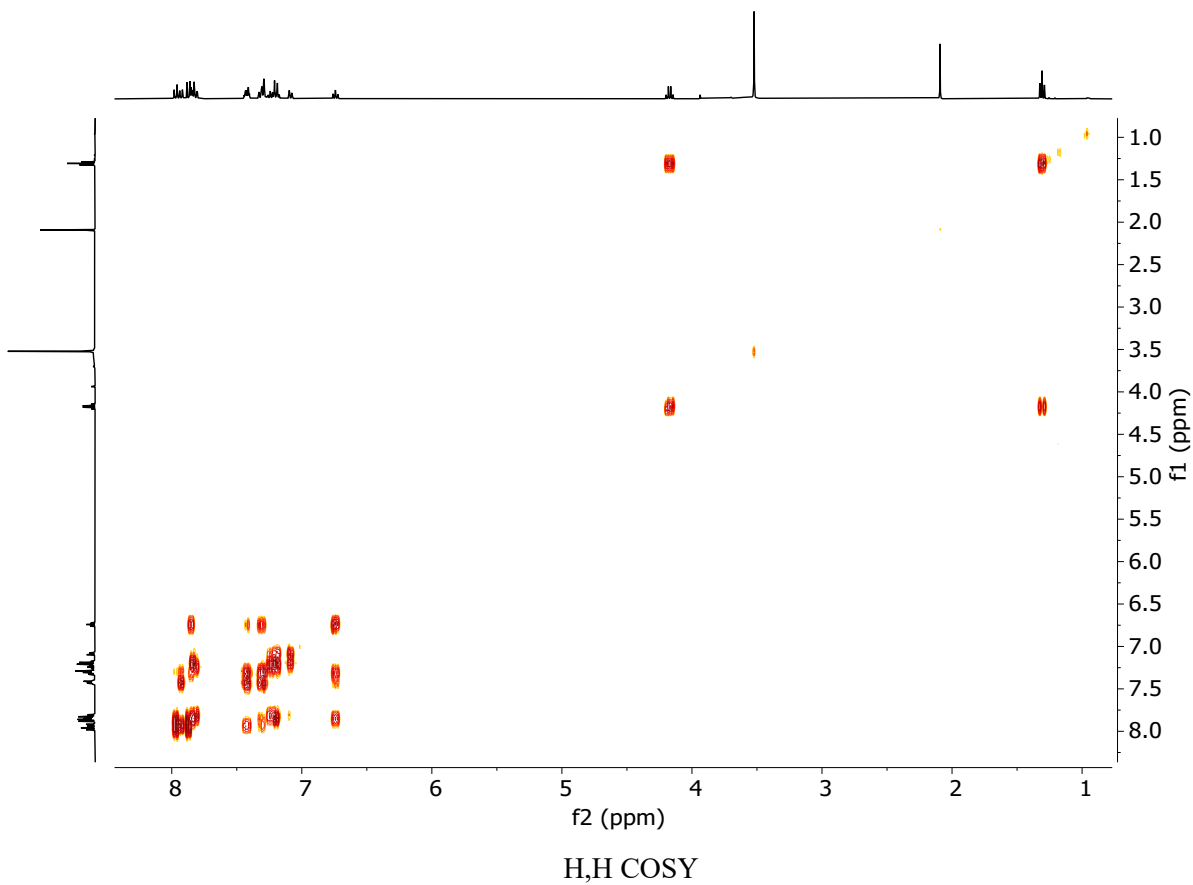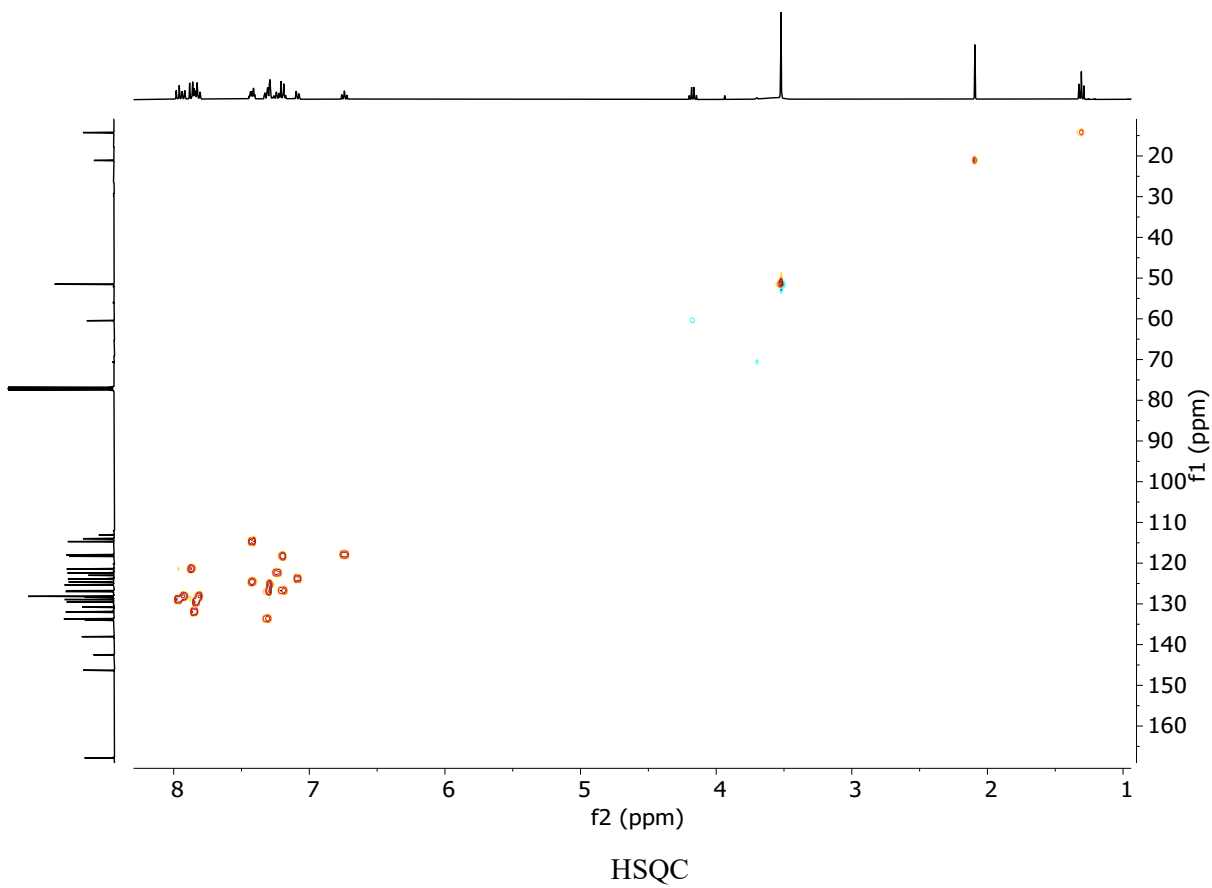

RT: 0.00 - 14.00 SM: 11G

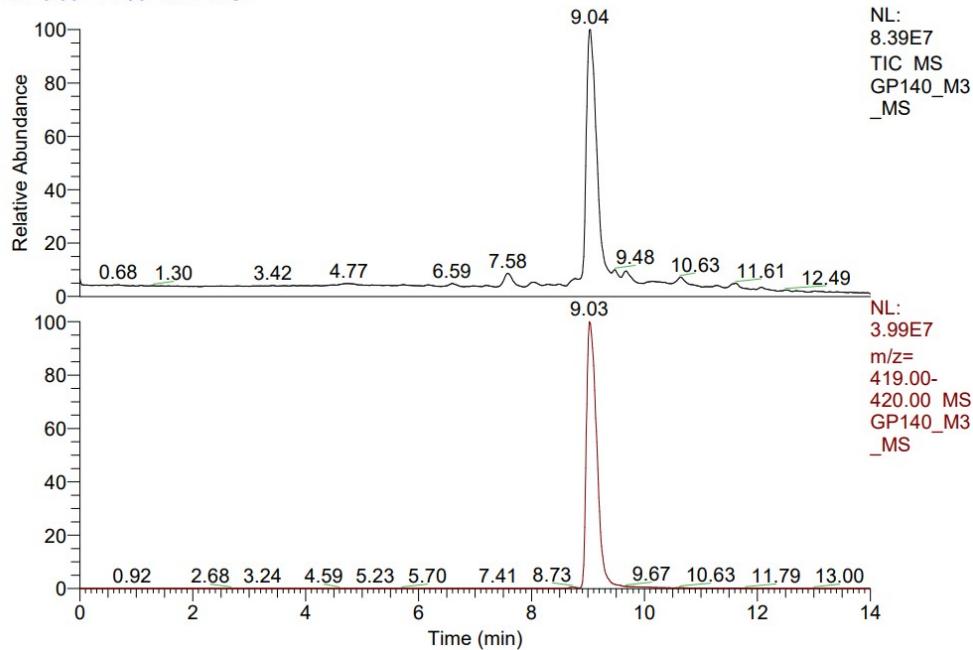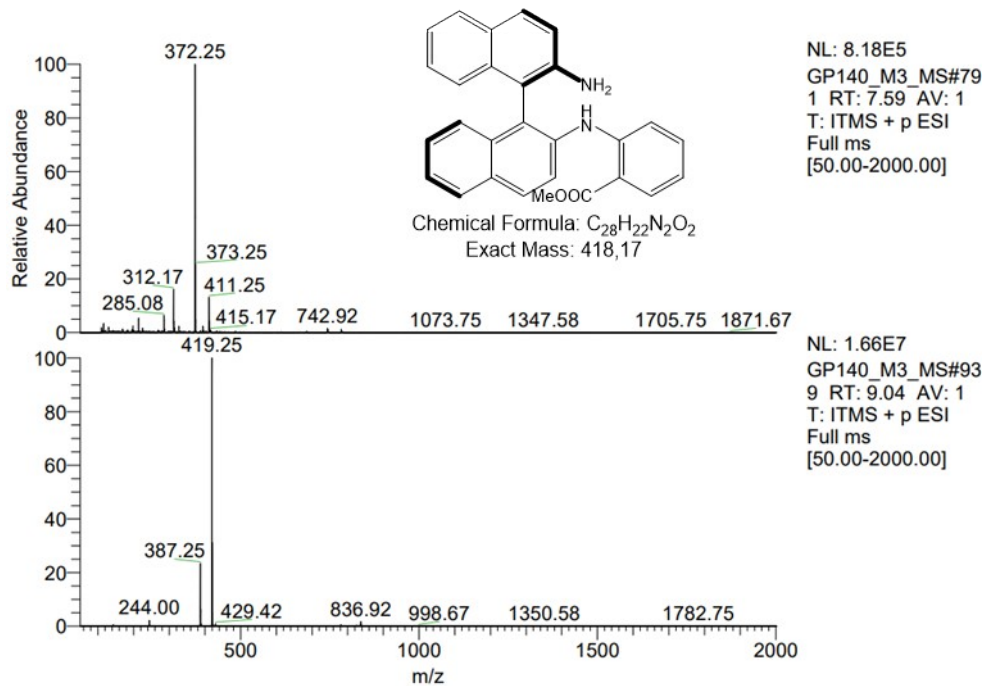

UPLC-ESI

# Compound (RR)-2

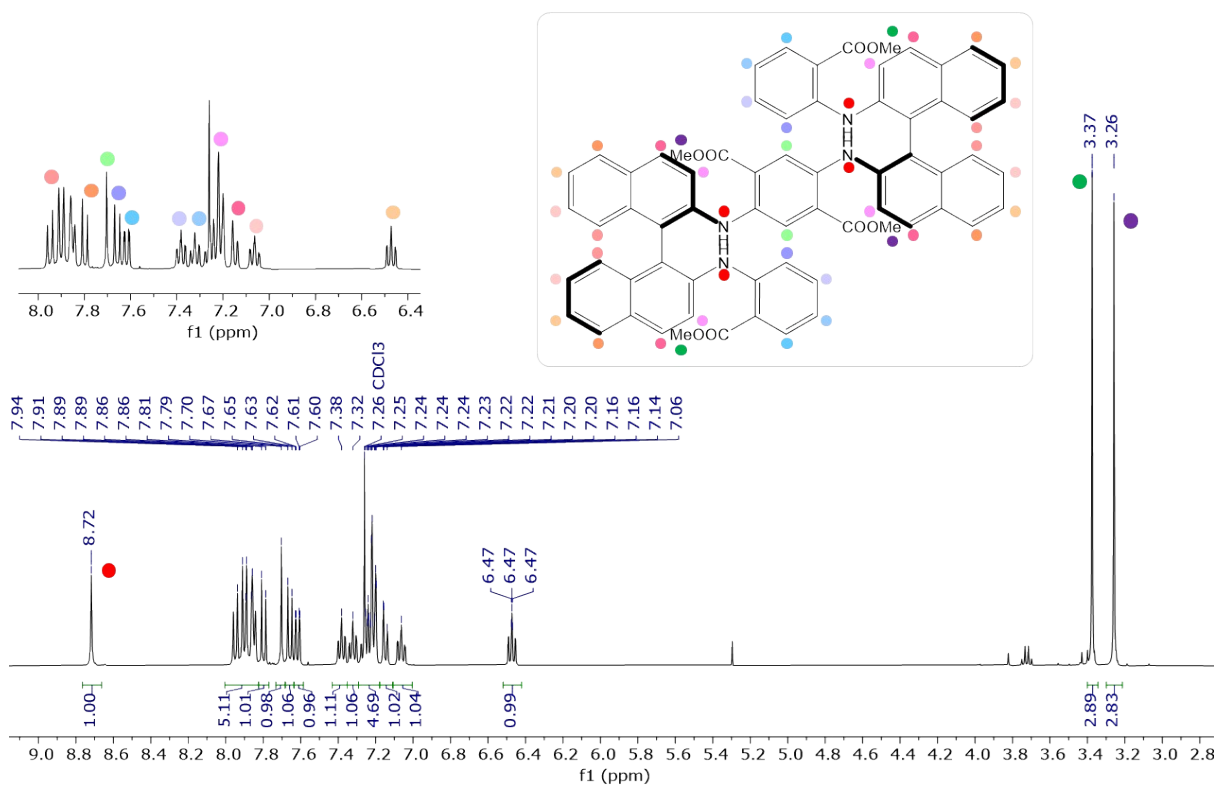

<sup>1</sup>H NMR (400 MHz, CDCl<sub>3</sub>)

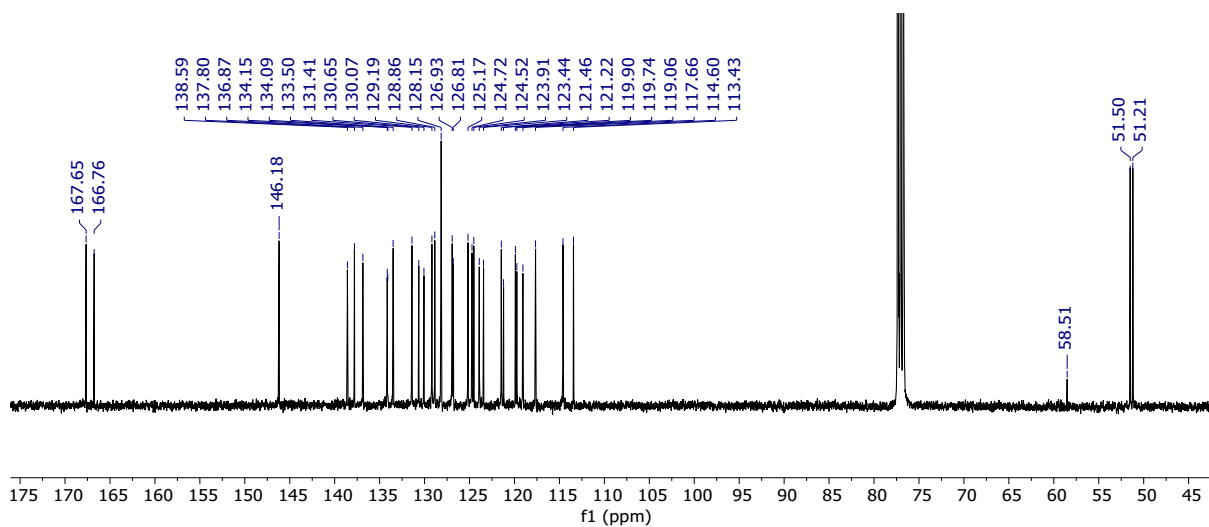

<sup>13</sup>C NMR (101 MHz, CDCl<sub>3</sub>)

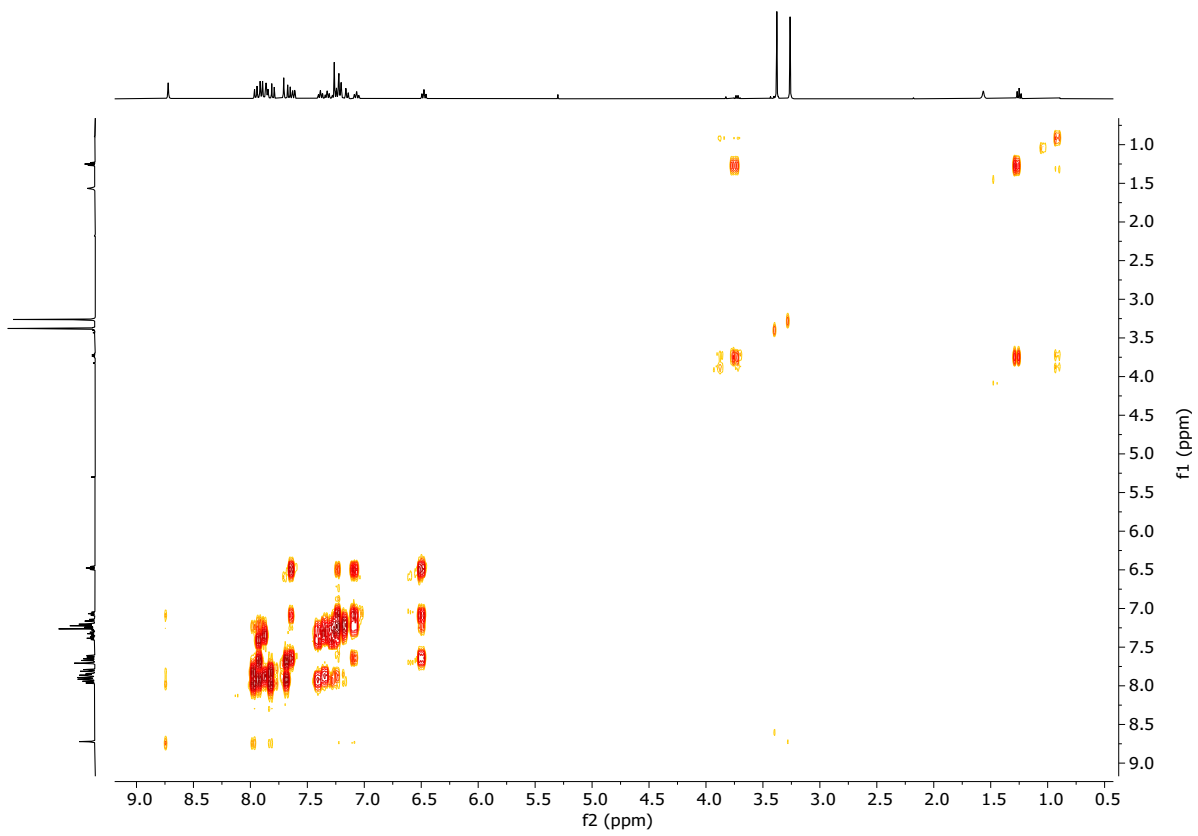

H,H COSY

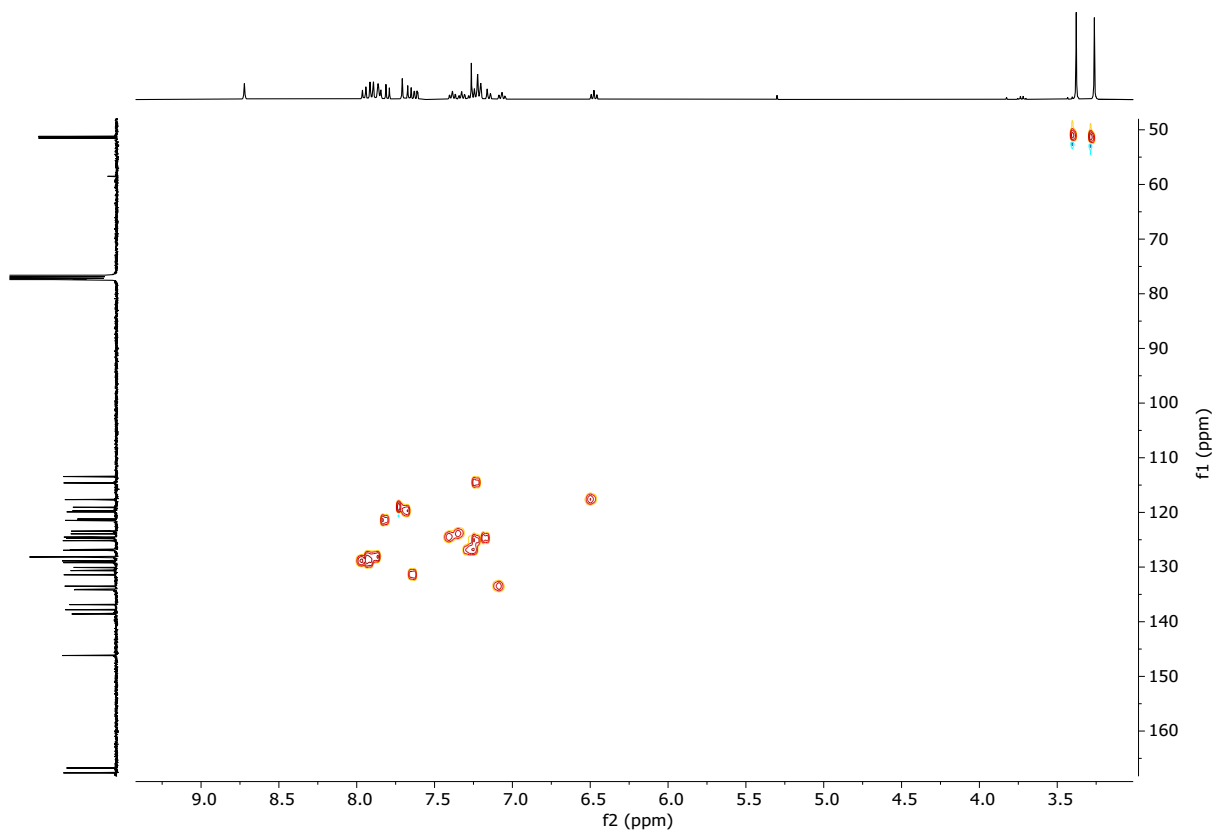

HSQC

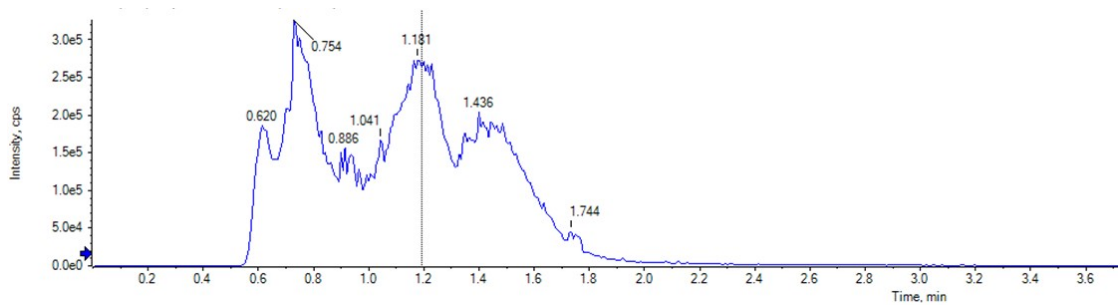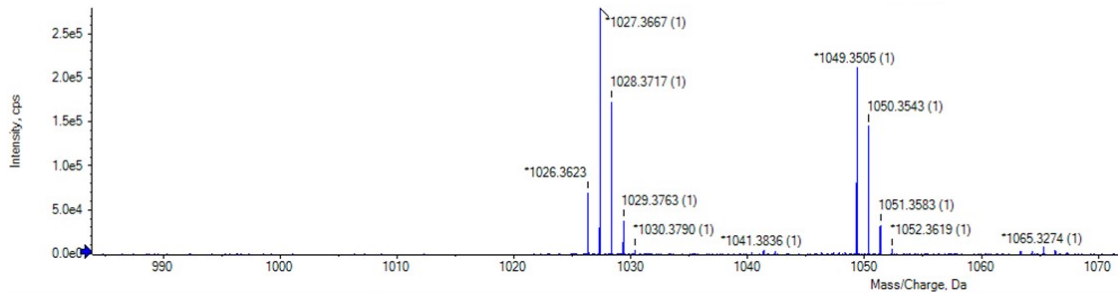

| Found elemental compositions |                                                               |           |      |      |         |           |       |
|------------------------------|---------------------------------------------------------------|-----------|------|------|---------|-----------|-------|
| Ht                           | Formula                                                       | m/z       | RDB  | ppm  | MS Rank | MSMS Rank | Found |
| 1                            | C <sub>66</sub> H <sub>51</sub> N <sub>4</sub> O <sub>8</sub> | 1027.3701 | 44.0 | -3.3 | 1       |           | NA/NA |

MS result summary for C<sub>66</sub>H<sub>51</sub>N<sub>4</sub>O<sub>8</sub>, [M+H]<sup>+</sup>

Ion type: [M+H]<sup>+</sup>  5 additional ions...

HRMS
